# Supplementary material
Source: publisher figshare collection journal article supplement (https://acs.figshare.com/ndownloader/files/5539118)
Supplement: Supplementary file 1 [file 5539118]

# Supporting Information

## Effects of Syndiotacticity on the Dynamic and Static Phase Separation Properties of Poly(*N*-isopropylacrylamide) in Aqueous Solution

Takanori Tada<sup>1)</sup>, Tomohiro Hirano<sup>2)</sup>, Koichi Ute<sup>2)</sup>, Yukiteru Katsumoto<sup>3)</sup>,

Taka-Aki Asoh<sup>4)</sup>, Tatsuya Shoji<sup>5)</sup>, Noboru Kitamura<sup>1, 6)</sup>\*, and Yasuyuki Tsuboi<sup>5)</sup>\*

<sup>1</sup> *Graduate School of Chemical Sciences and Engineering, Hokkaido University, Sapporo 060-0810, Japan*

<sup>2</sup> *Department of Chemical Science and Technology, Institute of Technology and Science, The University of Tokushima, Minamijosanjima 2-1, Tokushima 770-8506, Japan*

<sup>3</sup> *Department of Chemistry, Faculty of Science, Fukuoka University, Jonan-ku, Fukuoka 814-0180, Japan*

<sup>4</sup> *Advanced Research Institute of Natural Science and Technology, Osaka City University, 3-3-138 Sugimoto Sumiyoshi-ku, Osaka-shi, 558-8585, Japan*

<sup>5</sup> *Division of Molecular Material Science, Graduate School of Science, Osaka City University, 3-3-138, Sugimoto, Sumiyoshi0ku, Osaka 558-8585, Japan*

<sup>6</sup> *Division of Chemistry, Graduate School of Science, Hokkaido University, Sapporo 060-0810, Japan.*

\* corresponding author

E-mail: [kitamura@sci.hokudai.ac.jp](mailto:kitamura@sci.hokudai.ac.jp) (NK)\_

[twoboys@sci.osaka-cu.ac.jp](mailto:twoboys@sci.osaka-cu.ac.jp) (YT)

Phone: +81-6-6605-2505 (YT)

**Dynamic phase separation behavior in r-66 and r-67**

The Dynamic phase separation behavior in r-66 and r-67 was qualitatively similar to that of r-68, and briefly presented here. Figure S1 shows transient changes in optical transmittance (obtained by method (ii) laser T-jump experiments) by varying laser fluence.

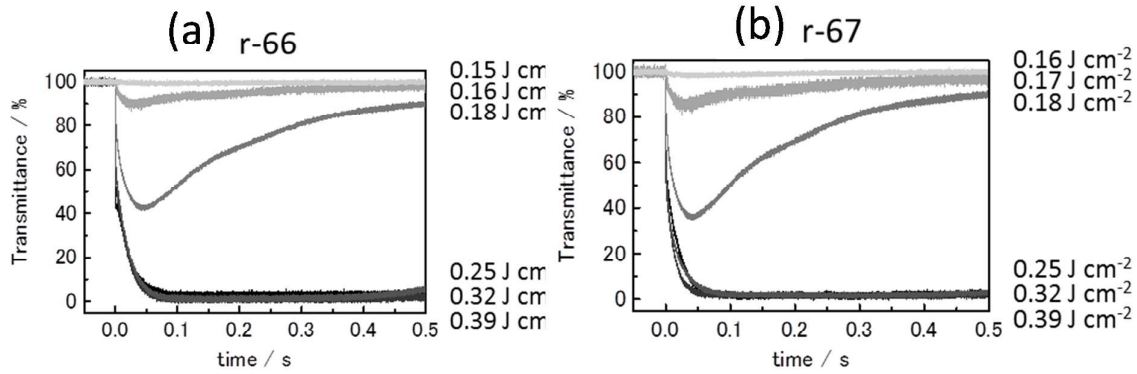

**Figure S1.** Transient changes in optical

transmittance for 5.0 wt% aqueous solutions of (a) r-66 and (b) r-67.

Analysis of Figure S1 gave us time  $\tau_{ps}$  (time constant of phase separation), which is plotted against polymer concentration for (a) r-66 and (b) r-67 in Figure S2.

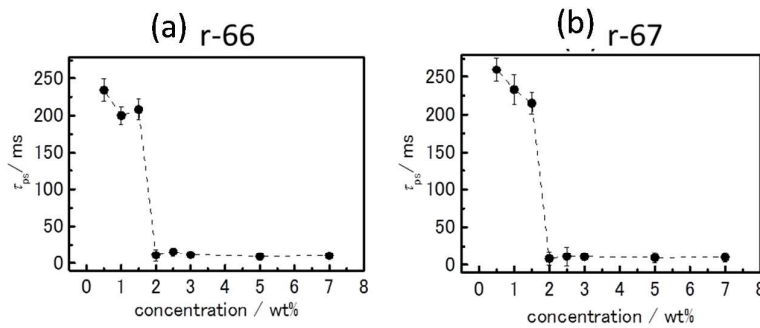

**Figure S2.** Phase separation constants as a function of concentration for (a) r-66 and (b) r-67.

**DLS**

To investigate aspects of polymer aggregation, DLS was measured for r-66 and r-67.

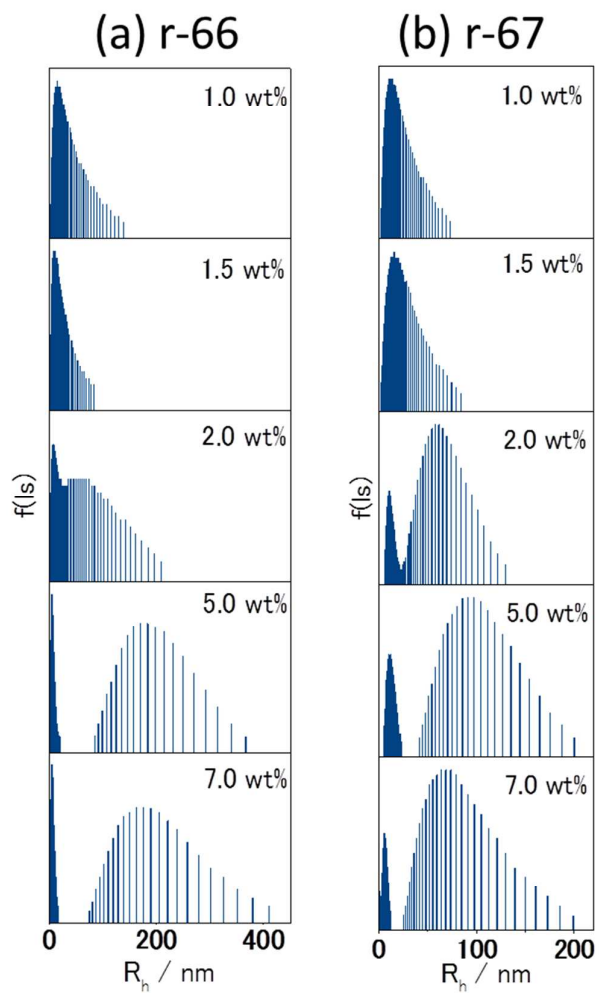

**Figure S3.** Hydrodynamic radius distribution as a function of polymer concentration for (a) r-66 and (b) r-67.
